# Supplementary material
Source: HighWire-hosted journal article supplement (https://bmjopen.bmj.com/content/7/12/e018855)
Supplement: inline-supplementary-material-1 [file inline-supplementary-material-1.pdf]

## Appendix A: Medline Search Strategy (OVID)

1. nurse\*.mp. (303447)
2. nurses/ or nurse administrators/ or nurse practitioners/ or nurse specialists/ or nurses, community health/ or nurses, international/ or nurses, male/ or nurses, public health/ or nursing staff, hospital/ (105987)
3. exp nurse/ (81652)
4. exp nursing staff/ (62823)
5. nurse's role/ (38554)
6. nursing informatics\* .mp. (1628)
7. 1 or 2 or 3 or 4 or 5 or 6 [nurse set] (331029)
8. informatics/ or medical informatics/ or nursing informatics/ (12644)
9. health informatics.mp. (2379)
10. 8 or 9 [informatics set] (14233)
11. competenc\*.mp. (158566)
12. nurse administrator (12570)
13. 7 or 12 [nursing set] (331029)
14. clinical competence/ (80867)
15. 10 and 13 (1853)
16. 11 or 14 [competency set] (158566)
17. 15 and 16 (334)
18. nurse manage\*.mp. (3237)
19. 17 and 18 (7)
20. nurse leader\*.mp. (1623)
21. 17 and 20 (11)
22. 17 or 19 or 21 (334)

## Appendix B: Data Extraction table

| <b>Overview</b>                                                                                                                                              |                                                                                                                                       |
|--------------------------------------------------------------------------------------------------------------------------------------------------------------|---------------------------------------------------------------------------------------------------------------------------------------|
| Study summary                                                                                                                                                | Author(s)                                                                                                                             |
|                                                                                                                                                              | Date of publication                                                                                                                   |
|                                                                                                                                                              | Type of study (Published/Grey)                                                                                                        |
|                                                                                                                                                              | Country                                                                                                                               |
|                                                                                                                                                              | Objectives/Aims/Research Questions                                                                                                    |
|                                                                                                                                                              | Design/Methods                                                                                                                        |
|                                                                                                                                                              | Setting                                                                                                                               |
|                                                                                                                                                              | Participants (type of nurse leader)                                                                                                   |
|                                                                                                                                                              | Results                                                                                                                               |
|                                                                                                                                                              | <b>Research Questions</b>                                                                                                             |
| Scoping review question 1: What nurse leader informatics competencies have been identified in the literature?                                                | Reported informatics leadership competencies for nurse leaders<br>Organization of reported informatics competencies for nurse leaders |
| Scoping review question 2: What frameworks or theories have been utilized in the development of informatics competencies for nurse leaders?                  | Framework or theory(s): use and application                                                                                           |
| Scoping review question 3: What instruments have been developed and are being used to assess the informatics competencies of nurse leaders?                  | Instrument(s) developed to assess informatics competencies of nurse leaders (name, number of items, what instrument measures)         |
| Scoping review question 4: What are the psychometric properties of the instruments identified for the assessment of nurse leaders' informatics competencies? | Psychometric properties of the instruments (e.g., reported reliability, validity, factors)                                            |

| Quality     |  |
|-------------|--|
| Grade Score |  |
